# Supplementary material for: Nicking Enzyme Assisted Amplification Combined with CRISPR-Cas12a System for One-Pot Sensitive Detection of APE1
Source: Research Square preprint supplement (doi:10.21203/rs.3.rs-5683890/v1), 2024-12-27
Supplement: Supplementary file 1 [file 02de74c2a74a051a38afb9df.docx]

**Nicking Enzyme Assisted Amplification Combined with CRISPR-Cas12a System for One-Pot Sensitive Detection of APE1**

**Wei Dai1,2, #, Han Wang3, #, Xian Xiao1, Yiyuan Li1, Jiahui Zhou1, Dayang Jiang4, Yangkang Luo1, Xianjin Xiao5, Longjie Li1, Jie Yu1, *, Bei Yan2, *,**

**1 School of Life Science and Technology, Wuhan Polytechnic University, Wuhan 430023, China**

**2 Human Sperm Bank, Institute of Medical Sciences, General Hospital of Ningxia Medical University, Yinchuan, 750004, China**

**3 Union Hospital, Tongji Medical College, Huazhong University of Science and Technology, Wuhan 430022, China**

**4 Department of Nephrology, Xiangya Hospital of Central South University, Changsha, Hunan, 410008，China**

**5 State Key Laboratory of Chemo/Biosensing and Chemometrics, Hunan University, Changsha 410082, China**

**# These authors contributed equally.**

**Corresponding author: yujie0326@163.com, d202081630@hust.edu.cn**

**Table S1. Sequences used in the study**

| **Name** | **Sequence（5’— >3’）** | **Role in the study** |
| --- | --- | --- |
| **crRNA** | UAAUUUCUACUAAGUGUAGAUCUAUAAUUUUUCGUGCAGUG | Figure 1-5 |
| **Primer-1** | AAATGACCTAG**/AP/**ACTGACCTCAAAC | Figure 1-3 |
| **Template-1** | CTATAATTTTTCGTGCAGTGTTAGTTCTAGGTCATTT | Figure 1-3 |
| **Reporter Probe** | **BHQ-**TTATTATT**-FAM** | Figure 1-5 |
| **Primer-2** | AAATGACCTAG**/AP/**ACTGACCTTATA | Figure 3 |
| **Primer-3** | ACGACCAAATGACCTAG**/AP/**ACTGACCTTATA**-P** | Figure 3 |
| **Template-2** | CTATAATTTTTCGTGCAGTGTTAGTTCTAGGTCATTTGGTCGT | Figure 3 |
| **Primer-4** | ACGACCAAATGACCTAG**/AP/**ACTGACCTTAT-**ddATP** | Figure 3 |
| **Template- Primer** | CTATAATTTTTCGTGCAGTGTTAGTTCTAGGTCATTTGGTCGT**AAAAAA**ACGACCAAATGACCTAG**/AP/**ACTGACCTTAT-**ddATP** | Figure 3-5 |

The modifications on probes were highlighted with bold font.

**
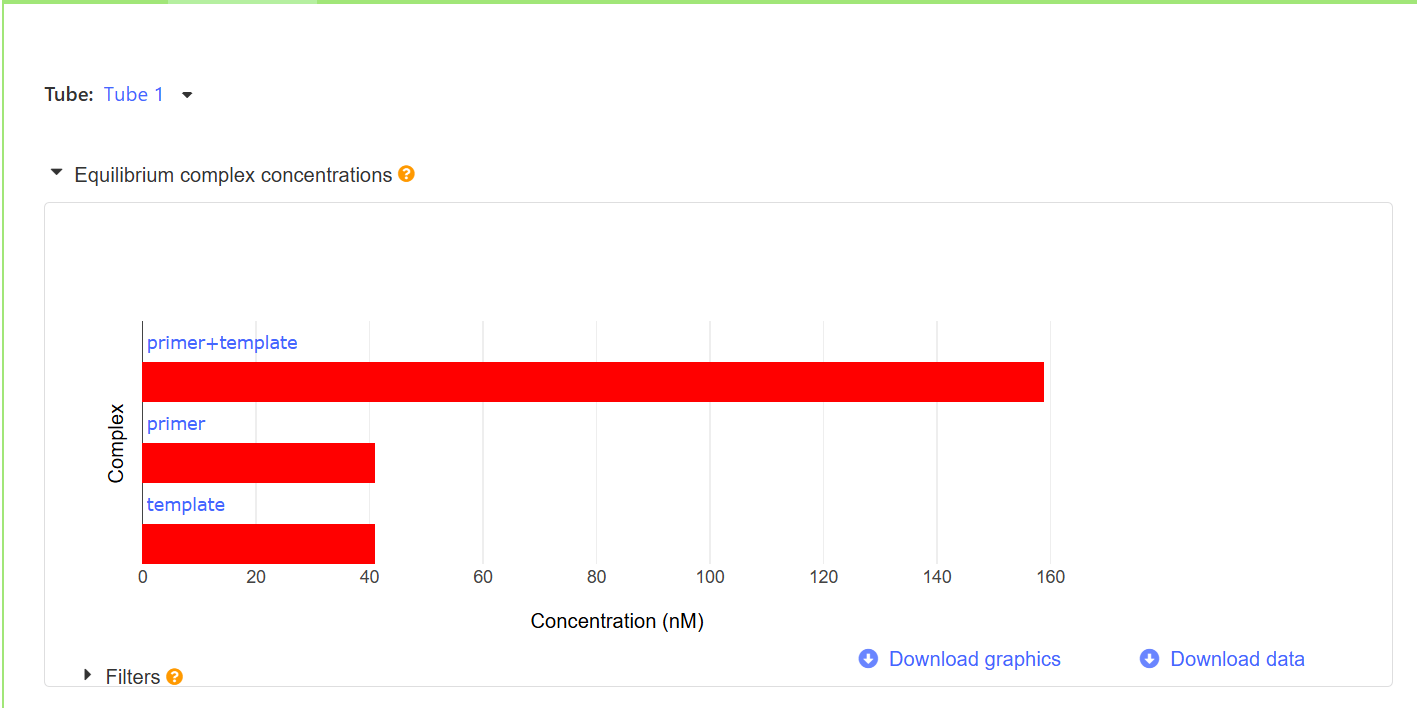

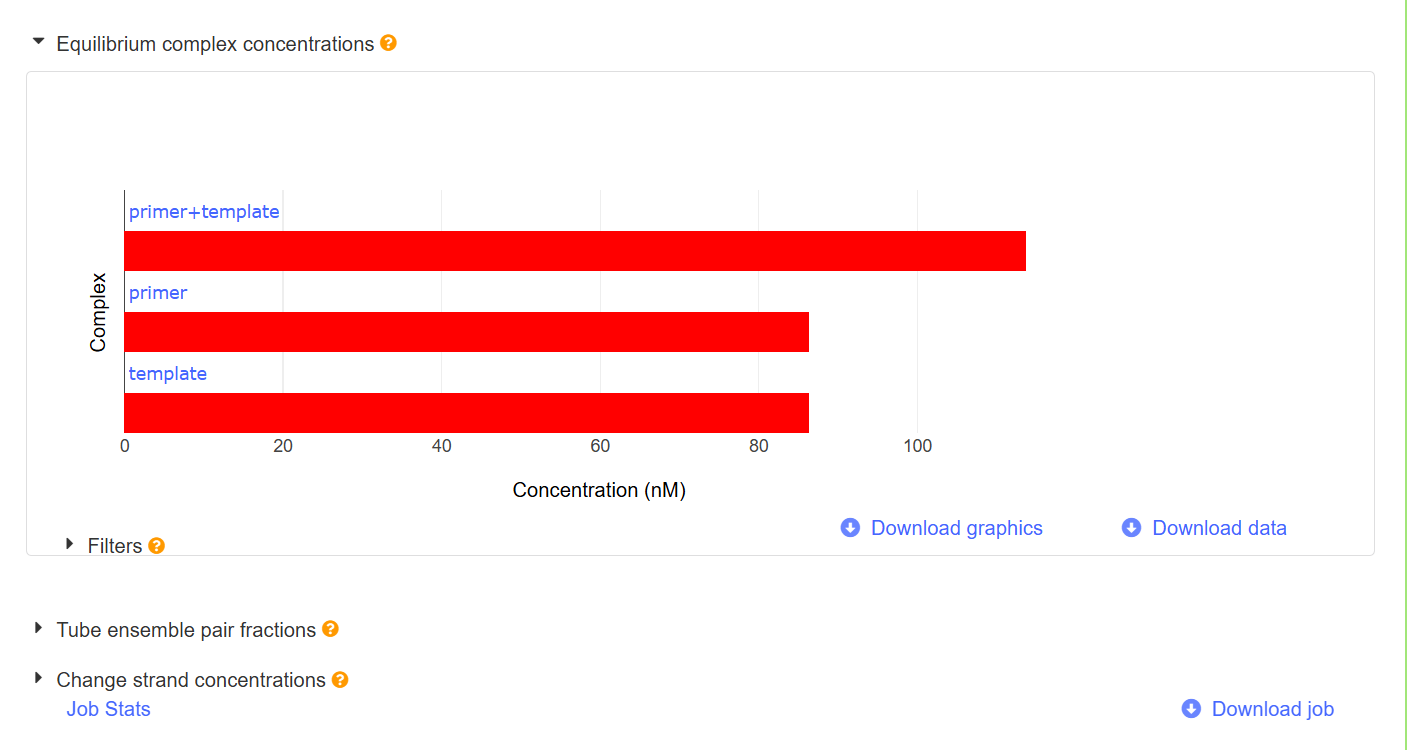

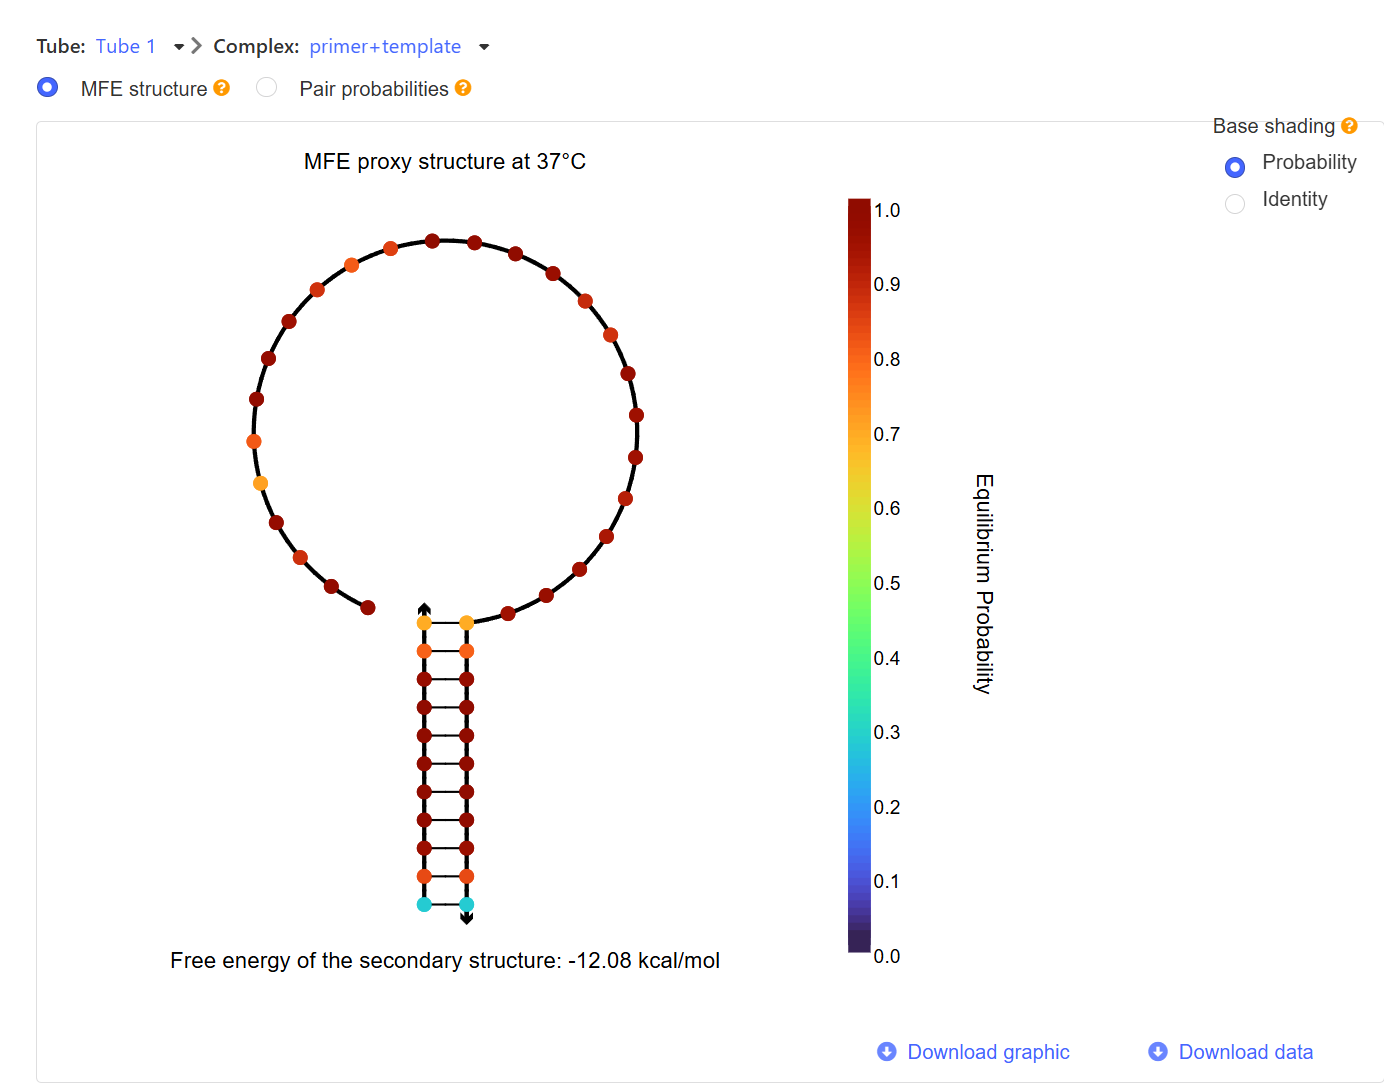

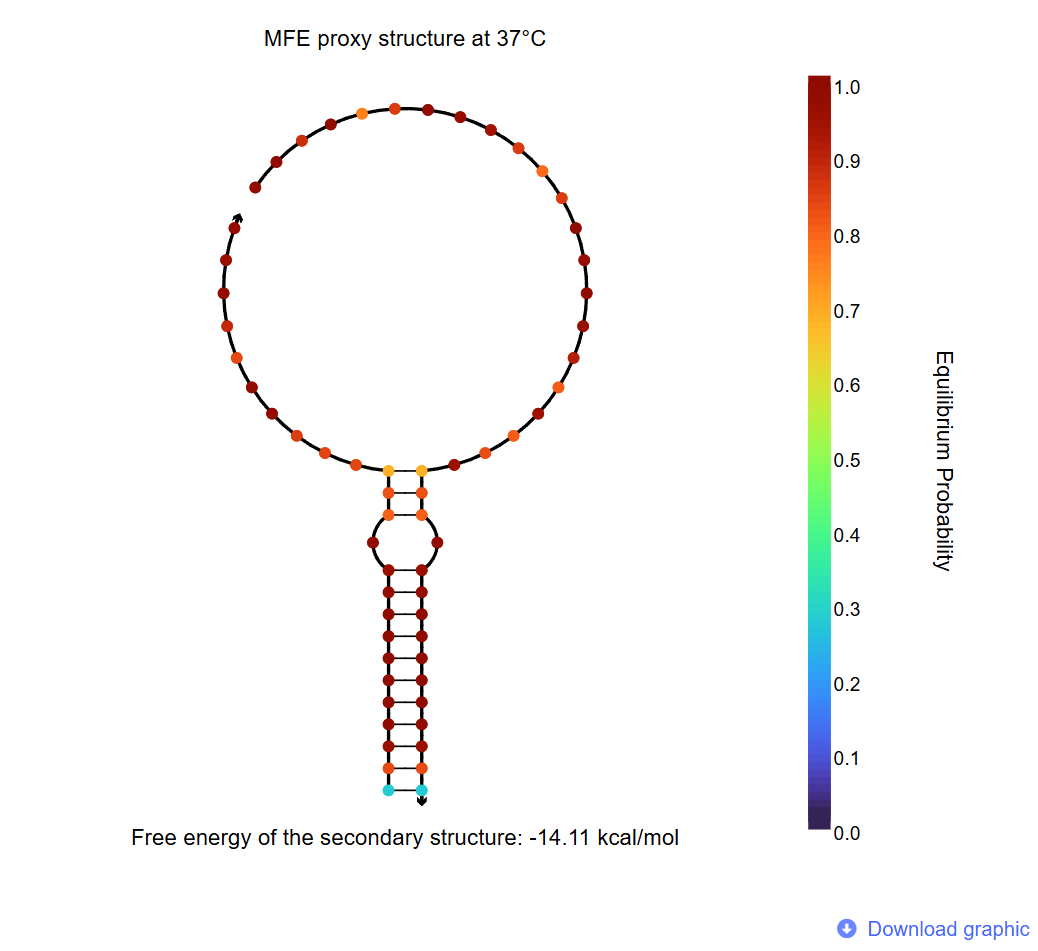
**

**B.** **Detection Probe after cleavage （Primer-1 and Pemplate-1）.**

**A. Detection Probe（Primer-1 and Pemplate-1）.**

**Figure S1. The structure and concentration distribution of the detection probe and the cleaved detection probe in the system.**

**Table S2. Comparison of the analytical performance of some reported methods in APE1 detection**

| **Method strategy** | **Signal** | **Sensitivity** | **Operation complexity** | **Time** | **Assay temperature** | **Ref** |
| --- | --- | --- | --- | --- | --- | --- |
| A sensitive sensing system enables rapid activation of gated HRCA upon intelligent recognition of APE1. | fluorescence | 0.0001U/mL | Simple | 90min | 37℃ | [1] |
| Host-guest interaction between b-CDP and pyrene | fluorescence | 0.05 U/mL | moderate | 40 min | 37 °C | [2] |
| An integrated electrochemical biosensing system that gives consideration to both immunoassay and enzyme activity analysis | Electrochemical signal | 0.00518 U/mL | complex | ＞3h | 37℃ | [3] |
| closed cycle circuit (CCC) | fluorescence | 7.8×10−5 U /mL | complex | 1h | ？ | [4] |
| primer exchange reaction (PER) cascade rolling circle amplification (RCA)/ dimeric G-quadruplex | fluorescence | 0.001U/mL | Simple | 2h | 37℃ | [5] |

**References**

1. Kang Q, Yang X, Du Y, Qi Y, He Z, Xiang H (2023) A molecular gated HRCA quick sensing system intelligently controlled by APE1. Microchemical Journal 191:108880
2. Zhou M, Qin S, Feng Z, Song C, Zhang H, Li W, Wang Q, Liu J, Huang J, Yang X (2018) A simple and sensitive assay for apurinic/apyrimidinic endonuclease 1 activity based on host-guest interaction of β-cyclodextrin polymer and pyrene. Chinese Chemical Letters 29 (6):973-976
3. Zhou M, Feng C, Mao D, Yang S, Ren L, Chen G, Zhu X (2019) An electrochemical biosensor integrating immunoassay and enzyme activity analysis for accurate detection of active human apurinic/apyrimidinic endonuclease 1. Biosensors and Bioelectronics 142:111558
4. Chai Q, Chen J, Zeng S, Zhu T, Chen J, Qi C, Mao G, Liu Y (2023) Closed cyclic DNA machine for sensitive logic operation and APE1 detection. Small 19 (23):2207736
5. Qi Y, Du Y, Kang Q, Yang X, Xiang H (2023) A novel self-feedback biosensor for label-free detection of APE1 by primer exchange reaction and rolling circle amplification/dimeric G-quadruplex. Microchemical Journal 193:109246
